# Supplementary material for: Anion polarizabilities in oxynitride glasses. Establishing a common optical basicity scale
Source: Royal Society of Chemistry journal article supplement (doi:10.1039/c9cp06930e), 2020-01-01
Supplement: c9cp06930e1.pdf [file c9cp06930e1.pdf]

## Supplementary Information

### Anion polarizabilities and optical basicity in oxynitride glasses. Establishing a common optical basicity scale

Doris Möncke<sup>a,b,c\*</sup>, Sharafat Ali<sup>b</sup>, Bo Jonson<sup>b</sup>, Efstratios I. Kamitsos<sup>a\*</sup>

<sup>a</sup> Theoretical and Physical Chemistry Institute, National Hellenic Research Foundation  
48 Vassileos Constantinou Avenue, 11635 Athens, Greece

<sup>b</sup> Linnæus University, Department of Built Environment and Energy Technology  
35195 Växjö, Sweden

<sup>c</sup> Inamori School of Engineering at the New York State College of Ceramics, Alfred University, 1  
Saxon Drive, Alfred, 14802 New York, USA

In memoriam to John A. Duffy \*1932 -©2015

Corresponding authors.

[moncke@alfred.edu](mailto:moncke@alfred.edu) (D. Möncke), and [eikam@eie.gr](mailto:eikam@eie.gr) (E.I. Kamitsos)

-----  
**Tables S1A-H. Composition in at%, ratio of oxygen over nitrogen N/O, density, molar volume  $V_m$ , measured and calculated refractive index  $n$ , average polarizability  $\alpha_m$ , cation polarizability  $\alpha_C$ , average anion polarizability  $\alpha_{O\&N}$  and theoretical optical basicity  $\Lambda_{th}$**

**Table S1A**

| Si-O-N<br>Bååk [1]                               | N/O  | Density<br>(g/cm <sup>3</sup> ) | Vm<br>(cm <sup>3</sup> /mol) | n<br>(@546 nm) | $\alpha_m$<br>(Å <sup>3</sup> ) | $\alpha_C$<br>(Å <sup>3</sup> ) | $\alpha_{O\&N}$<br>(Å <sup>3</sup> ) | $\Lambda_{th}$ |
|--------------------------------------------------|------|---------------------------------|------------------------------|----------------|---------------------------------|---------------------------------|--------------------------------------|----------------|
| Si <sub>42</sub> N <sub>58</sub>                 | -    | 3.09                            | 45.40                        | 2.008          | 9.0                             | 0.099                           | 2.24                                 | 0.80           |
| Si <sub>42</sub> O <sub>3</sub> N <sub>55</sub>  | 18.0 | 3.00                            | 44.09                        | 1.953          | 8.5                             | 0.092                           | 2.20                                 | 0.75           |
| Si <sub>42</sub> O <sub>6</sub> N <sub>52</sub>  | 8.0  | 2.91                            | 42.69                        | 1.898          | 7.9                             | 0.086                           | 2.16                                 | 0.70           |
| Si <sub>41</sub> O <sub>10</sub> N <sub>49</sub> | 4.7  | 2.81                            | 41.36                        | 1.842          | 7.3                             | 0.079                           | 2.12                                 | 0.65           |
| Si <sub>40</sub> O <sub>15</sub> N <sub>45</sub> | 3.0  | 2.73                            | 39.63                        | 1.787          | 6.6                             | 0.073                           | 2.05                                 | 0.60           |
| Si <sub>40</sub> O <sub>20</sub> N <sub>40</sub> | 2.0  | 2.65                            | 37.80                        | 1.732          | 6.0                             | 0.066                           | 1.98                                 | 0.55           |
| Si <sub>39</sub> O <sub>26</sub> N <sub>35</sub> | 1.3  | 2.56                            | 36.00                        | 1.676          | 5.4                             | 0.059                           | 1.90                                 | 0.50           |
| Si <sub>38</sub> O <sub>33</sub> N <sub>29</sub> | 0.9  | 2.47                            | 34.07                        | 1.621          | 4.8                             | 0.053                           | 1.81                                 | 0.45           |
| Si <sub>37</sub> O <sub>42</sub> N <sub>21</sub> | 0.5  | 2.38                            | 31.98                        | 1.566          | 4.1                             | 0.046                           | 1.70                                 | 0.40           |
| Si <sub>35</sub> O <sub>53</sub> N <sub>12</sub> | 0.2  | 2.29                            | 29.74                        | 1.511          | 3.5                             | 0.040                           | 1.59                                 | 0.35           |
| Si <sub>33</sub> O <sub>67</sub>                 | -    | 2.20                            | 27.31                        | 1.456          | 2.9                             | 0.033                           | 1.45                                 | 0.30           |

Values might not add up to 100% due to rounding

[1] T. Bååk, "Silicon oxynitride; a material for GRIN optics", App. Opt. 21 (1982) 1069-1072.

**Table S1B**

| <b>Mg-Si-O-N<br/>Ali [2,3]</b>                                        | <b>N/O</b> | <b>Density<br/>(g/cm<sup>3</sup>)</b> | <b>Vm<br/>(cm<sup>3</sup>/mol)</b> | <b>n<br/>(@633 nm)</b> | <b><math>\alpha_m</math><br/>(Å<sup>3</sup>)</b> | <b><math>\alpha_c</math><br/>(Å<sup>3</sup>)</b> | <b><math>\alpha_{O\&amp;N}</math><br/>(Å<sup>3</sup>)</b> | <b><math>\Lambda_{th}</math></b> |
|-----------------------------------------------------------------------|------------|---------------------------------------|------------------------------------|------------------------|--------------------------------------------------|--------------------------------------------------|-----------------------------------------------------------|----------------------------------|
| Mg <sub>17</sub> Si <sub>28</sub> O <sub>25</sub> N <sub>30</sub>     | 1.200      | 3.09                                  | 653.64                             | 1.893                  | 119.9                                            | 0.056                                            | 2.13                                                      | 0.70                             |
| Mg <sub>19</sub> Si <sub>26</sub> O <sub>24</sub> N <sub>32</sub>     | 1.333      | 3.02                                  | 670.27                             | 1.922                  | 125.7                                            | 0.059                                            | 2.20                                                      | 0.72                             |
| Mg <sub>15</sub> Si <sub>29.5</sub> O <sub>19.5</sub> N <sub>36</sub> | 1.846      | 2.99                                  | 673.64                             | 1.896                  | 123.8                                            | 0.054                                            | 2.19                                                      | 0.72                             |
| Mg <sub>17</sub> Si <sub>29.5</sub> O <sub>15.5</sub> N <sub>40</sub> | 2.581      | 3.01                                  | 679.43                             | 1.948                  | 129.9                                            | 0.055                                            | 2.29                                                      | 0.74                             |
| Mg <sub>20</sub> Si <sub>25</sub> O <sub>24</sub> N <sub>31</sub>     | 1.292      | 2.99                                  | 671.04                             | 1.994                  | 132.5                                            | 0.060                                            | 2.36                                                      | 0.72                             |
| Mg <sub>25</sub> Si <sub>22</sub> O <sub>21</sub> N <sub>32</sub>     | 1.524      | 3.00                                  | 669.09                             | 1.961                  | 129.1                                            | 0.065                                            | 2.38                                                      | 0.77                             |
| Mg <sub>28</sub> Si <sub>20</sub> O <sub>22</sub> N <sub>31</sub>     | 1.409      | 2.99                                  | 678.41                             | 1.999                  | 134.4                                            | 0.069                                            | 2.47                                                      | 0.78                             |
| Mg <sub>30</sub> Si <sub>16</sub> O <sub>45</sub> N <sub>9</sub>      | 0.200      | 2.98                                  | 679.37                             | 1.748                  | 109.5                                            | 0.073                                            | 1.97                                                      | 0.65                             |
| Mg <sub>25</sub> Si <sub>21</sub> O <sub>32</sub> N <sub>22</sub>     | 0.688      | 2.99                                  | 674.76                             | 1.843                  | 118.8                                            | 0.066                                            | 2.14                                                      | 0.72                             |
| Mg <sub>12</sub> Si <sub>31</sub> O <sub>33</sub> N <sub>24</sub>     | 0.727      | 3.05                                  | 664.40                             | 1.814                  | 114.0                                            | 0.050                                            | 1.96                                                      | 0.69                             |

Values might not add up to 100% due to rounding

[2] S. Ali, B. Paul, R. Magnusson, G. Greczynski, E. Broitman, B. Jonson, P. Eklund, J. Birch, "Novel transparent MgSiON thin films with high hardness and refractive index", *Vacuum*, 131 (2016) 1-4.

[3] S. Ali, B. Paul, R. Magnusson, E. Ekström, C. Pallier, B. Jonson, P. Eklund, J. Birch, Per Eklund, and Jens Birch "Optical and mechanical properties of Mg-Si-O-N thin films deposited by reactive magnetron sputtering", *Surface and Coatings Technology*, 2019, 372, p. 9-15.

**Table S1C**

| <b>Ca-Si-O-N<br/>Ali [4,5]</b>                                            | <b>N/O</b> | <b>Density<br/>(g/cm<sup>3</sup>)</b> | <b>Vm<br/>(cm<sup>3</sup>/mol)</b> | <b>n<br/>(@633 nm)</b> | <b><math>\alpha_m</math><br/>(Å<sup>3</sup>)</b> | <b><math>\alpha_c</math><br/>(Å<sup>3</sup>)</b> | <b><math>\alpha_{O\&amp;N}</math><br/>(Å<sup>3</sup>)</b> | <b><math>\Lambda_{th}</math></b> |
|---------------------------------------------------------------------------|------------|---------------------------------------|------------------------------------|------------------------|--------------------------------------------------|--------------------------------------------------|-----------------------------------------------------------|----------------------------------|
| Ca <sub>13.4</sub> Si <sub>25.7</sub> O <sub>56.06</sub> N <sub>6.4</sub> | 0.11       | 2.80                                  | 311.81                             | 1.62                   | 43.4                                             | 0.18                                             | 1.69                                                      | 0.62                             |
| Ca <sub>12.8</sub> Si <sub>26.4</sub> O <sub>53.8</sub> N <sub>8.5</sub>  | 0.16       | 2.81                                  | 300.38                             | 1.65                   | 43.4                                             | 0.18                                             | 1.75                                                      | 0.62                             |
| Ca <sub>20.1</sub> Si <sub>21.8</sub> O <sub>48.9</sub> N <sub>10.6</sub> | 0.22       | 3.02                                  | 355.96                             | 1.70                   | 54.5                                             | 0.24                                             | 1.85                                                      | 0.70                             |
| Ca <sub>16.3</sub> Si <sub>24.7</sub> O <sub>48.5</sub> N <sub>12.1</sub> | 0.25       | 2.90                                  | 319.63                             | 1.69                   | 48.4                                             | 0.21                                             | 1.85                                                      | 0.67                             |
| Ca <sub>23.4</sub> Si <sub>20.1</sub> O <sub>44.7</sub> N <sub>13.3</sub> | 0.30       | 3.13                                  | 382.81                             | 1.74                   | 61.2                                             | 0.27                                             | 1.94                                                      | 0.75                             |
| Ca <sub>26.4</sub> Si <sub>18.2</sub> O <sub>42.5</sub> N <sub>14.3</sub> | 0.34       | 3.09                                  | 435.48                             | 1.75                   | 70.3                                             | 0.29                                             | 2.05                                                      | 0.79                             |
| Ca <sub>24.9</sub> Si <sub>19.5</sub> O <sub>41.2</sub> N <sub>15.8</sub> | 0.39       | 3.02                                  | 412.10                             | 1.74                   | 65.9                                             | 0.28                                             | 2.06                                                      | 0.78                             |
| Ca <sub>21.7</sub> Si <sub>22.0</sub> O <sub>39.5</sub> N <sub>18.3</sub> | 0.46       | 3.02                                  | 356.60                             | 1.72                   | 55.8                                             | 0.25                                             | 1.97                                                      | 0.76                             |
| Ca <sub>25.0</sub> Si <sub>19.6</sub> O <sub>40.2</sub> N <sub>16.7</sub> | 0.41       | 3.11                                  | 399.13                             | 1.75                   | 64.5                                             | 0.28                                             | 2.02                                                      | 0.78                             |
| Ca <sub>20.4</sub> Si <sub>23.7</sub> O <sub>34.8</sub> N <sub>22.8</sub> | 0.65       | 3.05                                  | 325.96                             | 1.83                   | 56.7                                             | 0.24                                             | 2.18                                                      | 0.76                             |
| Ca <sub>24.3</sub> Si <sub>20.9</sub> O <sub>34.4</sub> N <sub>21.9</sub> | 0.64       | 3.09                                  | 374.69                             | 1.85                   | 66.4                                             | 0.27                                             | 2.27                                                      | 0.80                             |
| Ca <sub>25.9</sub> Si <sub>19.7</sub> O <sub>34.6</sub> N <sub>21.3</sub> | 0.61       | 2.94                                  | 421.56                             | 1.76                   | 68.8                                             | 0.28                                             | 2.22                                                      | 0.82                             |
| Ca <sub>22.1</sub> Si <sub>22.9</sub> O <sub>31.4</sub> N <sub>25.2</sub> | 0.80       | 3.12                                  | 333.12                             | 1.92                   | 62.4                                             | 0.25                                             | 2.36                                                      | 0.79                             |
| Sr <sub>22.7</sub> Si <sub>22.8</sub> O <sub>29.7</sub> N <sub>26.5</sub> | 0.89       | 3.25                                  | 323.34                             | 1.94                   | 61.4                                             | 0.25                                             | 2.32                                                      | 0.81                             |
| Sr <sub>23.9</sub> Si <sub>21.9</sub> O <sub>29.2</sub> N <sub>26.5</sub> | 0.91       | 3.24                                  | 339.89                             | 1.95                   | 65.1                                             | 0.26                                             | 2.37                                                      | 0.82                             |

Values might not add up to 100% due to rounding

[4] A. Sharafat, J. Grins, S. Esmaeilzadeh, "Hardness and refractive index of Ca-Si-O-N glasses", *J. Non-Cryst. Solids* 355 (2009) 301-304.

[5] S. Ali, "Preparation, characterization and properties of nitrogen rich glasses in alkaline earth-Si-O-N systems", PhD thesis Stockholm University, Sweden, 2009.

**Table S1D**

| <b>Sr-Si-O-N</b><br><b>Ali [6,7]</b>                                      | <b>N/O</b> | <b>Density</b><br><b>(g/cm<sup>3</sup>)</b> | <b>Vm</b><br><b>(cm<sup>3</sup>/mol)</b> | <b>n</b><br><b>(@633 nm)</b> | <b>α<sub>m</sub></b><br><b>(Å<sup>3</sup>)</b> | <b>α<sub>c</sub></b><br><b>(Å<sup>3</sup>)</b> | <b>α<sub>O&amp;N</sub></b><br><b>(Å<sup>3</sup>)</b> | <b>Λ<sub>th</sub></b> |
|---------------------------------------------------------------------------|------------|---------------------------------------------|------------------------------------------|------------------------------|------------------------------------------------|------------------------------------------------|------------------------------------------------------|-----------------------|
| Sr <sub>18.6</sub> Si <sub>23.4</sub> O <sub>45.6</sub> N <sub>13.9</sub> | 0.30       | 3.80                                        | 361.50                                   | 1.68                         | 54.2                                           | 0.40                                           | 1.87                                                 | 0.73                  |
| Sr <sub>19.3</sub> Si <sub>22.9</sub> O <sub>45.3</sub> N <sub>14.0</sub> | 0.31       | 3.72                                        | 382.78                                   | 1.66                         | 56.0                                           | 0.41                                           | 1.89                                                 | 0.74                  |
| Sr <sub>20.3</sub> Si <sub>21.8</sub> O <sub>48.8</sub> N <sub>10.7</sub> | 0.22       | 3.69                                        | 414.08                                   | 1.73                         | 65.5                                           | 0.43                                           | 2.11                                                 | 0.74                  |
| Sr <sub>20.4</sub> Si <sub>22.3</sub> O <sub>44.0</sub> N <sub>14.8</sub> | 0.33       | 3.86                                        | 386.62                                   | 1.68                         | 57.9                                           | 0.43                                           | 1.91                                                 | 0.76                  |
| Sr <sub>21.0</sub> Si <sub>21.2</sub> O <sub>48.8</sub> N <sub>10.5</sub> | 0.21       | 3.90                                        | 407.13                                   | 1.74                         | 65.1                                           | 0.45                                           | 2.04                                                 | 0.75                  |
| Sr <sub>19.9</sub> Si <sub>23.1</sub> O <sub>41.3</sub> N <sub>17.3</sub> | 0.42       | 3.83                                        | 372.30                                   | 1.77                         | 61.3                                           | 0.42                                           | 2.14                                                 | 0.77                  |
| Sr <sub>22.3</sub> Si <sub>21.6</sub> O <sub>39.4</sub> N <sub>18.2</sub> | 0.46       | 4.01                                        | 398.31                                   | 1.88                         | 72.3                                           | 0.46                                           | 2.40                                                 | 0.80                  |
| Sr <sub>17.9</sub> Si <sub>23.6</sub> O <sub>48.2</sub> N <sub>11.8</sub> | 0.24       | 3.59                                        | 374.76                                   | 1.65                         | 54.2                                           | 0.39                                           | 1.88                                                 | 0.72                  |
| Sr <sub>21.0</sub> Si <sub>22.3</sub> O <sub>41.2</sub> N <sub>17.0</sub> | 0.41       | 3.90                                        | 387.26                                   | 1.76                         | 63.2                                           | 0.44                                           | 2.12                                                 | 0.78                  |
| Sr <sub>23.5</sub> Si <sub>21.1</sub> O <sub>36.7</sub> N <sub>20.2</sub> | 0.55       | 4.00                                        | 417.74                                   | 1.93                         | 78.8                                           | 0.47                                           | 2.59                                                 | 0.83                  |
| Sr <sub>23.0</sub> Si <sub>21.0</sub> O <sub>40.5</sub> N <sub>17.1</sub> | 0.42       | 4.07                                        | 409.36                                   | 1.87                         | 73.7                                           | 0.47                                           | 2.36                                                 | 0.80                  |

Values might not add up to 100% due to rounding

[6] S. Ali, Preparation, characterization and properties of nitrogen rich glasses in alkaline earth-Si-O-N systems, PhD thesis Stockholm University, Sweden, 2009.

[7] S. Ali,, B. Forslund, J. Grins, S. Esmailzadeh, Formation and properties of nitrogen-rich strontium silicon oxynitride glasses, J. Mat. Science 44 (2009) 664.

**Table S1E**

| <b>Ba-Si-O-N</b><br><b>Ali [8]</b>                                        | <b>N/O</b> | <b>Density</b><br><b>(g/cm<sup>3</sup>)</b> | <b>Vm</b><br><b>(cm<sup>3</sup>/mol)</b> | <b>n</b><br><b>(@633 nm)</b> | <b>α<sub>m</sub></b><br><b>(Å<sup>3</sup>)</b> | <b>α<sub>c</sub></b><br><b>(Å<sup>3</sup>)</b> | <b>α<sub>O&amp;N</sub></b><br><b>(Å<sup>3</sup>)</b> | <b>Λ<sub>th</sub></b> |
|---------------------------------------------------------------------------|------------|---------------------------------------------|------------------------------------------|------------------------------|------------------------------------------------|------------------------------------------------|------------------------------------------------------|-----------------------|
| Ba <sub>12.7</sub> Si <sub>26.0</sub> O <sub>57.6</sub> N <sub>5.3</sub>  | 0.09       | 3.27                                        | 409.7                                    | 1.66                         | 60.0                                           | 0.55                                           | 2.16                                                 | 0.68                  |
| Ba <sub>13.0</sub> Si <sub>26.0</sub> O <sub>55.9</sub> N <sub>6.6</sub>  | 0.12       | 3.31                                        | 407.9                                    | 1.68                         | 61.1                                           | 0.56                                           | 2.22                                                 | 0.69                  |
| Ba <sub>15.0</sub> Si <sub>25.0</sub> O <sub>53.2</sub> N <sub>8.5</sub>  | 0.16       | 3.49                                        | 428.5                                    | 1.70                         | 65.7                                           | 0.62                                           | 2.28                                                 | 0.72                  |
| Ba <sub>13.7</sub> Si <sub>26.3</sub> O <sub>49.8</sub> N <sub>11.8</sub> | 0.24       | 3.42                                        | 398.5                                    | 1.67                         | 59.0                                           | 0.57                                           | 2.18                                                 | 0.72                  |
| Ba <sub>18.2</sub> Si <sub>23.0</sub> O <sub>50.5</sub> N <sub>9.8</sub>  | 0.19       | 3.68                                        | 485.8                                    | 1.74                         | 77.7                                           | 0.73                                           | 2.49                                                 | 0.78                  |
| Ba <sub>20.5</sub> Si <sub>21.8</sub> O <sub>46.8</sub> N <sub>12.4</sub> | 0.26       | 3.92                                        | 511.1                                    | 1.82                         | 88.2                                           | 0.79                                           | 2.71                                                 | 0.83                  |
| Ba <sub>21.3</sub> Si <sub>21.8</sub> O <sub>42.9</sub> N <sub>15.5</sub> | 0.36       | 4.05                                        | 504.2                                    | 1.86                         | 90.0                                           | 0.81                                           | 2.80                                                 | 0.86                  |
| Ba <sub>19.5</sub> Si <sub>23.6</sub> O <sub>40.3</sub> N <sub>18.1</sub> | 0.45       | 3.79                                        | 476.1                                    | 1.78                         | 79.2                                           | 0.74                                           | 2.67                                                 | 0.84                  |
| Ba <sub>22.2</sub> Si <sub>21.3</sub> O <sub>42.5</sub> N <sub>15.5</sub> | 0.36       | 4.18                                        | 512.6                                    | 1.91                         | 95.3                                           | 0.83                                           | 2.90                                                 | 0.88                  |
| Ba <sub>22.2</sub> Si <sub>21.7</sub> O <sub>38.9</sub> N <sub>18.6</sub> | 0.47       | 4.13                                        | 509.4                                    | 1.89                         | 93.2                                           | 0.83                                           | 2.92                                                 | 0.89                  |

Values might not add up to 100% due to rounding

[8] S. Ali, B. Jonson, Glasses in the Ba-Si-O-N System, J. Am. Cer. Soc. 94 (2011) 2912-2917.

**Table S1F**

| <b>La-Pr-Si-O-N</b>                                                                 | <b>N/O</b> | <b>Density</b>            | <b>Vm</b>                   | <b>n</b>        | $\alpha_m$             | $\alpha_c$             | $\alpha_{O\&N}$        | $\Lambda_{th}$ |
|-------------------------------------------------------------------------------------|------------|---------------------------|-----------------------------|-----------------|------------------------|------------------------|------------------------|----------------|
| <b>Ali [9]</b>                                                                      |            | <b>(g/cm<sup>3</sup>)</b> | <b>(cm<sup>3</sup>/mol)</b> | <b>(640 nm)</b> | <b>(Å<sup>3</sup>)</b> | <b>(Å<sup>3</sup>)</b> | <b>(Å<sup>3</sup>)</b> |                |
| La <sub>23</sub> Si <sub>19</sub> O <sub>25</sub> N <sub>33</sub>                   | 1.30       | 5.12                      | 9.13                        | 1.958           | 92.5                   | 0.60                   | 2.62                   | 1.05           |
| La <sub>23</sub> Pr <sub>0.7</sub> Si <sub>18</sub> O <sub>26</sub> N <sub>33</sub> | 1.25       | 5.19                      | 9.35                        | 1.962           | 98.9                   | 0.62                   | 2.59                   | 1.06           |
| La <sub>22</sub> Pr <sub>1.4</sub> Si <sub>18</sub> O <sub>29</sub> N <sub>30</sub> | 1.06       | 5.22                      | 9.07                        | 1.967           | 96.9                   | 0.61                   | 2.60                   | 1.05           |
| La <sub>21</sub> Pr <sub>2.3</sub> Si <sub>18</sub> O <sub>30</sub> N <sub>29</sub> | 0.95       | 5.27                      | 8.92                        | 1.970           | 95.3                   | 0.61                   | 2.55                   | 1.03           |
| La <sub>20</sub> Pr <sub>4</sub> Si <sub>18</sub> O <sub>28</sub> N <sub>31</sub>   | 1.10       | 5.34                      | 8.96                        | 1.973           | 97.4                   | 0.61                   | 2.57                   | 1.06           |
| La <sub>17</sub> Pr <sub>7</sub> Si <sub>18</sub> O <sub>27</sub> N <sub>32</sub>   | 1.17       | 5.37                      | 9.01                        | 1.976           | 99.4                   | 0.62                   | 2.60                   | 1.07           |
| La <sub>15</sub> Pr <sub>10</sub> Si <sub>18</sub> O <sub>29</sub> N <sub>30</sub>  | 1.03       | 5.39                      | 8.91                        | 1.979           | 98.6                   | 0.61                   | 2.57                   | 1.06           |
| La <sub>12</sub> Pr <sub>11</sub> Si <sub>18</sub> O <sub>30</sub> N <sub>29</sub>  | 0.97       | 5.42                      | 8.69                        | 1.982           | 93.1                   | 0.59                   | 2.51                   | 1.04           |
| La <sub>9</sub> Pr <sub>14</sub> Si <sub>19</sub> O <sub>29</sub> N <sub>30</sub>   | 1.00       | 5.44                      | 8.52                        | 1.985           | 88.1                   | 0.57                   | 2.47                   | 1.03           |
| La <sub>8</sub> Pr <sub>17</sub> Si <sub>17</sub> O <sub>27</sub> N <sub>31</sub>   | 1.12       | 5.46                      | 9.02                        | 1.989           | 103.9                  | 0.61                   | 2.64                   | 1.09           |
| La <sub>5</sub> Pr <sub>19</sub> Si <sub>18</sub> O <sub>29</sub> N <sub>30</sub>   | 1.02       | 5.47                      | 8.83                        | 1.994           | 99.1                   | 0.59                   | 2.59                   | 1.07           |
| La <sub>3</sub> Pr <sub>21</sub> Si <sub>18</sub> O <sub>29</sub> N <sub>30</sub>   | 1.02       | 5.47                      | 8.66                        | 1.997           | 93.5                   | 0.57                   | 2.55                   | 1.06           |
| Pr <sub>24</sub> Si <sub>19</sub> O <sub>30</sub> N <sub>30</sub>                   | 1.00       | 5.49                      | 8.59                        | 1.999           | 91.1                   | 0.56                   | 2.56                   | 1.05           |

Values might not add up to 100% due to rounding

[9] A. S. Hakeem, S. Ali, B. Jonson, Preparation and properties of mixed La–Pr silicate oxynitride glasses, J. Non-Cryst. Solids, 368 (2013) 93-97.

**Table S1G**

| <b>Y-Al-Si-O-N</b>                                                                             | <b>N/O</b> | <b>Density</b>            | <b>Vm</b>                   | <b>n</b>         | $\alpha_m$             | $\alpha_c$             | $\alpha_{O\&N}$        | $\Lambda_{th}$ |
|------------------------------------------------------------------------------------------------|------------|---------------------------|-----------------------------|------------------|------------------------|------------------------|------------------------|----------------|
| <b>Coon [10]</b>                                                                               |            | <b>(g/cm<sup>3</sup>)</b> | <b>(cm<sup>3</sup>/mol)</b> | <b>(@550 nm)</b> | <b>(Å<sup>3</sup>)</b> | <b>(Å<sup>3</sup>)</b> | <b>(Å<sup>3</sup>)</b> |                |
| Y <sub>9</sub> Al <sub>13</sub> Si <sub>15</sub> O <sub>63</sub> <sup>a</sup>                  | -          | 3.38                      | 767                         | 1.658            | 111.9                  | 0.17                   | 1.68                   | 0.63           |
| Y <sub>11</sub> Al <sub>12</sub> Si <sub>14</sub> O <sub>63</sub> <sup>a</sup>                 | -          | 3.57                      | 764                         | 1.686            | 115.2                  | 0.20                   | 1.72                   | 0.66           |
| Y <sub>13</sub> Al <sub>6</sub> Si <sub>19</sub> O <sub>56</sub> N <sub>6</sub> <sup>b</sup>   | 0.11       | 3.82                      | 731.38                      | 1.742            | 117.2                  | 0.21                   | 1.75                   | 0.68           |
| Y <sub>16</sub> Al <sub>4</sub> Si <sub>18</sub> O <sub>54</sub> N <sub>8</sub>                | 0.15       | 3.87                      | 776.81                      | 1.778            | 128.9                  | 0.25                   | 1.93                   | 0.72           |
| Y <sub>12</sub> Al <sub>7</sub> Si <sub>18</sub> O <sub>53</sub> N <sub>10</sub>               | 0.18       | 3.70                      | 747.95                      | 1.748            | 120.5                  | 0.20                   | 1.83                   | 0.70           |
| Y <sub>16</sub> Al <sub>4</sub> Si <sub>18</sub> O <sub>52</sub> N <sub>10</sub>               | 0.19       | 3.99                      | 745.82                      | 1.788            | 125.0                  | 0.25                   | 1.88                   | 0.74           |
| Y <sub>11</sub> Al <sub>9</sub> Si <sub>18</sub> O <sub>51</sub> N <sub>11</sub>               | 0.22       | 3.67                      | 738.96                      | 1.752            | 119.6                  | 0.19                   | 1.83                   | 0.70           |
| Y <sub>16</sub> Al <sub>9</sub> Si <sub>12</sub> O <sub>50</sub> N <sub>12</sub>               | 0.25       | 4.06                      | 726.31                      | 1.823            | 125.6                  | 0.26                   | 1.92                   | 0.80           |
| Y <sub>13</sub> Al <sub>13</sub> Si <sub>13</sub> O <sub>48</sub> N <sub>13</sub> <sup>b</sup> | 0.29       | 3.94                      | 722.91                      | 1.834            | 126.3                  | 0.21                   | 1.96                   | 0.75           |
| Y <sub>15</sub> Al <sub>10</sub> Si <sub>15</sub> O <sub>42</sub> N <sub>18</sub>              | 0.44       | 4.02                      | 736.23                      | 1.853            | 130.7                  | 0.23                   | 2.04                   | 0.79           |
| <b>Redmington [10]</b>                                                                         |            |                           |                             | <b>(@500 nm)</b> |                        |                        |                        |                |
| Y <sub>10</sub> Al <sub>22</sub> Si <sub>7</sub> O <sub>58</sub> N <sub>3</sub>                | 0.04       | 3.6                       | 734.2                       | 1.80             | 124.4                  | 0.17                   | 1.93                   | 0.82           |
| Y <sub>11</sub> Al <sub>20</sub> Si <sub>9</sub> O <sub>53</sub> N <sub>7</sub>                | 0.13       | 3.7                       | 726.3                       | 1.87             | 130.8                  | 0.18                   | 2.05                   | 0.84           |

Values might not add up to 100% due to rounding

<sup>a</sup>Value in Coon from Makashima et al. (J. Am. Ceram. Soc.1978, 61 (5-6): 247-249)

<sup>b</sup>Value in Coon from Messier and Deguire (J. Am. Ceram. Soc.1984, 67 (9): 602-605)

[10] D. N. Coon, T. E. Doyle, J. R. Weidner, Refractive indices of glasses in the Y-Al-Si-O-N system, J. Non-Cryst. Solids, 108 (1989) 180-186.

[11] W. Redington, M. Redington, S. Hampshire, M. Serantoni, Properties of some high Al content glasses in various lanthanide–Si–Al–O–N systems, J. Non-Cryst. Solids, 316 (2003) 74-81.

**Table S1H**

| <b>La-Si-O-N<br/>Hakeem<br/>[12,13]</b>                            | <b>N/O</b> | <b>Density<br/>(g/cm<sup>3</sup>)</b> | <b>Vm<br/>(cm<sup>3</sup>/mol)</b> | <b>n<br/>(@633 nm)</b> | <b><math>\alpha_m</math><br/>(Å<sup>3</sup>)</b> | <b><math>\alpha_c</math><br/>(Å<sup>3</sup>)</b> | <b><math>\alpha_{O\&amp;N}</math><br/>(Å<sup>3</sup>)</b> | <b><math>\Lambda_{th}</math></b> |
|--------------------------------------------------------------------|------------|---------------------------------------|------------------------------------|------------------------|--------------------------------------------------|--------------------------------------------------|-----------------------------------------------------------|----------------------------------|
| La <sub>16</sub> Si <sub>20</sub> O <sub>60</sub> N <sub>4</sub>   | 0.07       | 4.48                                  | 1907                               | 1.75                   | 68.7                                             | 0.49                                             | 1.92                                                      | 0.77                             |
| La <sub>13</sub> Si <sub>23</sub> O <sub>57</sub> N <sub>7</sub>   | 0.12       | 4.24                                  | 1517                               | 1.73                   | 56.6                                             | 0.41                                             | 1.84                                                      | 0.73                             |
| La <sub>16</sub> Si <sub>21</sub> O <sub>56</sub> N <sub>7</sub>   | 0.13       | 4.44                                  | 1853                               | 1.77                   | 68.7                                             | 0.48                                             | 2.00                                                      | 0.78                             |
| La <sub>16</sub> Si <sub>21</sub> O <sub>55</sub> N <sub>8</sub>   | 0.14       | 4.69                                  | 1841                               | 1.79                   | 65.9                                             | 0.48                                             | 1.92                                                      | 0.79                             |
| La <sub>16</sub> Si <sub>21</sub> O <sub>55</sub> N <sub>8.5</sub> | 0.15       | 4.70                                  | 1803                               | 1.78                   | 63.8                                             | 0.47                                             | 1.88                                                      | 0.78                             |
| La <sub>16</sub> Si <sub>21</sub> O <sub>54</sub> N <sub>9</sub>   | 0.16       | 4.55                                  | 1886                               | 1.8                    | 70.3                                             | 0.49                                             | 2.04                                                      | 0.80                             |
| La <sub>16</sub> Si <sub>21</sub> O <sub>52</sub> N <sub>11</sub>  | 0.21       | 4.56                                  | 1764                               | 1.84                   | 67.9                                             | 0.47                                             | 2.09                                                      | 0.80                             |
| La <sub>16</sub> Si <sub>22</sub> O <sub>50</sub> N <sub>12</sub>  | 0.25       | 4.44                                  | 1696                               | 1.84                   | 67.1                                             | 0.45                                             | 2.13                                                      | 0.79                             |
| La <sub>16</sub> Si <sub>22</sub> O <sub>50</sub> N <sub>12</sub>  | 0.244      | 4.66                                  | 1781                               | 1.87                   | 68.8                                             | 0.47                                             | 2.12                                                      | 0.81                             |
| La <sub>17</sub> Si <sub>21</sub> O <sub>49</sub> N <sub>13</sub>  | 0.27       | 4.72                                  | 1925                               | 1.88                   | 74.0                                             | 0.50                                             | 2.19                                                      | 0.83                             |
| La <sub>17</sub> Si <sub>21</sub> O <sub>44</sub> N <sub>18</sub>  | 0.40       | 4.68                                  | 1864                               | 1.89                   | 72.9                                             | 0.49                                             | 2.25                                                      | 0.85                             |
| La <sub>18</sub> Si <sub>21</sub> O <sub>44</sub> N <sub>17</sub>  | 0.39       | 4.77                                  | 1955                               | 1.89                   | 75.0                                             | 0.51                                             | 2.25                                                      | 0.86                             |
| La <sub>21</sub> Si <sub>18</sub> O <sub>44</sub> N <sub>17</sub>  | 0.38       | 5.14                                  | 2404                               | 1.92                   | 87.6                                             | 0.58                                             | 2.28                                                      | 0.92                             |
| La <sub>22</sub> Si <sub>18</sub> O <sub>43</sub> N <sub>17</sub>  | 0.40       | 5.15                                  | 2496                               | 1.92                   | 90.8                                             | 0.59                                             | 2.31                                                      | 0.93                             |
| La <sub>24</sub> Si <sub>15</sub> O <sub>46</sub> N <sub>15</sub>  | 0.32       | 5.46                                  | 3127                               | 1.94                   | 108.8                                            | 0.66                                             | 2.33                                                      | 0.97                             |
| La <sub>21</sub> Si <sub>19</sub> O <sub>39</sub> N <sub>21</sub>  | 0.53       | 4.91                                  | 2287                               | 1.94                   | 88.5                                             | 0.57                                             | 2.47                                                      | 0.94                             |
| La <sub>22</sub> Si <sub>18</sub> O <sub>37</sub> N <sub>23</sub>  | 0.62       | 5.28                                  | 2440                               | 1.94                   | 87.8                                             | 0.59                                             | 2.34                                                      | 0.97                             |
| La <sub>25</sub> Si <sub>15</sub> O <sub>41</sub> N <sub>19</sub>  | 0.47       | 5.42                                  | 3158                               | 1.95                   | 111.5                                            | 0.67                                             | 2.44                                                      | 1.00                             |
| La <sub>24</sub> Si <sub>17</sub> O <sub>34</sub> N <sub>25</sub>  | 0.75       | 5.36                                  | 2744                               | 1.94                   | 97.3                                             | 0.63                                             | 2.43                                                      | 1.02                             |
| La <sub>25</sub> Si <sub>17</sub> O <sub>31</sub> N <sub>27</sub>  | 0.85       | 5.27                                  | 2826                               | 1.96                   | 103.4                                            | 0.64                                             | 2.57                                                      | 1.04                             |
| La <sub>27</sub> Si <sub>15</sub> O <sub>34</sub> N <sub>24</sub>  | 0.70       | 5.51                                  | 3396                               | 1.98                   | 120.5                                            | 0.69                                             | 2.58                                                      | 1.07                             |
| La <sub>24</sub> Si <sub>18</sub> O <sub>23</sub> N <sub>35</sub>  | 1.45       | 4.99                                  | 2557                               | 2.31                   | 120.0                                            | 0.61                                             | 3.44                                                      | 1.07                             |
| La <sub>31</sub> Si <sub>14</sub> O <sub>14</sub> N <sub>41</sub>  | 2.80       | 5.51                                  | 3856                               | 2.28                   | 161.8                                            | 0.73                                             | 3.61                                                      | 1.25                             |

Values might not add up to 100% due to rounding

[12] A. S. Hakeem, J. Grins, S. Esmailzadeh, La–Si–O–N glasses: Part I. Extension of the glass forming region, J. Eur. Cer. Soci., 27 (2007) 4773-4781.

[132] A. S. Hakeem, J. Grins, S. Esmailzadeh, La-Si-O-N glasses: Part II: Vickers hardness and refractive index, J. Eur. Cer. Soc. 27 (2007) 4783-4787.

**Table S11**

| <b>AE-Ca-Si-O-N</b>                                                                | <b>N/O</b> | <b>Density<br/>(g/cm<sup>3</sup>)</b> | <b>Vm<br/>(cm<sup>3</sup>/mol)</b> | <b>n<br/>(@640 nm)</b> | <b><math>\alpha_m</math><br/>(Å<sup>3</sup>)</b> | <b><math>\alpha_c</math><br/>(Å<sup>3</sup>)</b> | <b><math>\alpha_{O\&amp;N}</math><br/>(Å<sup>3</sup>)</b> |
|------------------------------------------------------------------------------------|------------|---------------------------------------|------------------------------------|------------------------|--------------------------------------------------|--------------------------------------------------|-----------------------------------------------------------|
| <b>Ali [14,15]</b>                                                                 |            |                                       |                                    |                        |                                                  |                                                  |                                                           |
| Ca <sub>25</sub> Si <sub>19</sub> O <sub>40</sub> N <sub>15</sub>                  | 0.38       | 3.02                                  | 795.4                              | 1.74                   | 127.2                                            | 0.28                                             | 2.06                                                      |
| <b>Mg-Ca-Si-O-N</b>                                                                |            |                                       |                                    |                        |                                                  |                                                  |                                                           |
| Mg <sub>2</sub> Ca <sub>22</sub> Si <sub>21</sub> O <sub>37</sub> N <sub>19</sub>  | 0.52       | 3.02                                  | 781.3                              | 1.75                   | 126.2                                            | 0.25                                             | 2.07                                                      |
| Mg <sub>4</sub> Ca <sub>19</sub> Si <sub>21</sub> O <sub>38</sub> N <sub>19</sub>  | 0.49       | 3.00                                  | 767.8                              | 1.75                   | 124.0                                            | 0.22                                             | 2.04                                                      |
| Mg <sub>6</sub> Ca <sub>18</sub> Si <sub>21</sub> O <sub>37</sub> N <sub>19</sub>  | 0.49       | 2.98                                  | 766.7                              | 1.73                   | 121.3                                            | 0.21                                             | 2.00                                                      |
| Mg <sub>8</sub> Ca <sub>16</sub> Si <sub>21</sub> O <sub>38</sub> N <sub>18</sub>  | 0.48       | 2.96                                  | 763.6                              | 1.70                   | 117.0                                            | 0.20                                             | 1.94                                                      |
| <b>Sr-Ca-Si-O-N</b>                                                                |            |                                       |                                    |                        |                                                  |                                                  |                                                           |
| Sr <sub>3</sub> Ca <sub>21</sub> Si <sub>20</sub> O <sub>40</sub> N <sub>16</sub>  | 0.41       | 3.14                                  | 813.2                              | 1.77                   | 133.9                                            | 0.30                                             | 2.16                                                      |
| Sr <sub>8</sub> Ca <sub>18</sub> Si <sub>19</sub> O <sub>37</sub> N <sub>18</sub>  | 0.48       | 3.35                                  | 834.9                              | 1.84                   | 146.6                                            | 0.35                                             | 2.37                                                      |
| Sr <sub>10</sub> Ca <sub>16</sub> Si <sub>19</sub> O <sub>38</sub> N <sub>17</sub> | 0.47       | 3.49                                  | 830.9                              | 1.86                   | 148.4                                            | 0.37                                             | 2.39                                                      |
| Sr <sub>12</sub> Ca <sub>14</sub> Si <sub>19</sub> O <sub>38</sub> N <sub>17</sub> | 0.46       | 3.55                                  | 834.3                              | 1.88                   | 151.4                                            | 0.38                                             | 2.43                                                      |
| <b>Ba-Ca-Si-O-N</b>                                                                |            |                                       |                                    |                        |                                                  |                                                  |                                                           |
| Ba <sub>4</sub> Ca <sub>20</sub> Si <sub>20</sub> O <sub>39</sub> N <sub>17</sub>  | 0.44       | 3.35                                  | 819.4                              | 1.81                   | 140.1                                            | 0.37                                             | 2.22                                                      |
| Ba <sub>8</sub> Ca <sub>16</sub> Si <sub>20</sub> O <sub>40</sub> N <sub>16</sub>  | 0.41       | 3.67                                  | 848.2                              | 1.86                   | 151.5                                            | 0.46                                             | 2.34                                                      |
| Ba <sub>9</sub> Ca <sub>15</sub> Si <sub>20</sub> O <sub>40</sub> N <sub>16</sub>  | 0.39       | 3.84                                  | 837.4                              | 1.93                   | 158.0                                            | 0.49                                             | 2.43                                                      |
| Ba <sub>11</sub> Ca <sub>13</sub> Si <sub>20</sub> O <sub>42</sub> N <sub>15</sub> | 0.36       | 3.99                                  | 869.0                              | 1.97                   | 168.8                                            | 0.56                                             | 2.56                                                      |

Values might not add up to 100% due to rounding

[14] S. Ali, Preparation, characterization and properties of nitrogen rich glasses in alkaline earth-Si-O-N systems, PhD thesis Stockholm University, Sweden, 2009.

[15] S. Ali, et al., Properties of high nitrogen content mixed alkali earth oxynitride glasses (AE<sub>x</sub>Ca<sub>1-x</sub>)<sub>1.2(1)</sub>SiO<sub>1.9(1)</sub>N<sub>0.86(6)</sub>, AE=Mg, Sr, Ba. J. Non-Cryst. Solids 355 (2009) 1259-1263.

**Figures S1 a to f:** Experimentally derived average anion polarizability values (in  $\text{\AA}^3$ ) from refractive index data,  $\alpha_{O/N}$ , are plotted versus the calculated theoretical basicities using  $\Lambda(M_3N_m) = 3/2\Lambda(M_2O_m)$  for various multi-component systems (see Table 1 for more compositional details). The lines for pure oxides and nitrides follow equations (5)  $\alpha_O = (\Lambda + 0.547)/0.7$  and (13)  $\alpha_N = 0.37 + 2.56\Lambda_{th}$ , respectively. The color scheme reflects on the N:O ratio (N-rich: blue, O-rich red) and the numbers give the relative number of modifier atoms (in at% or for every 10 Si-atoms, respectively).

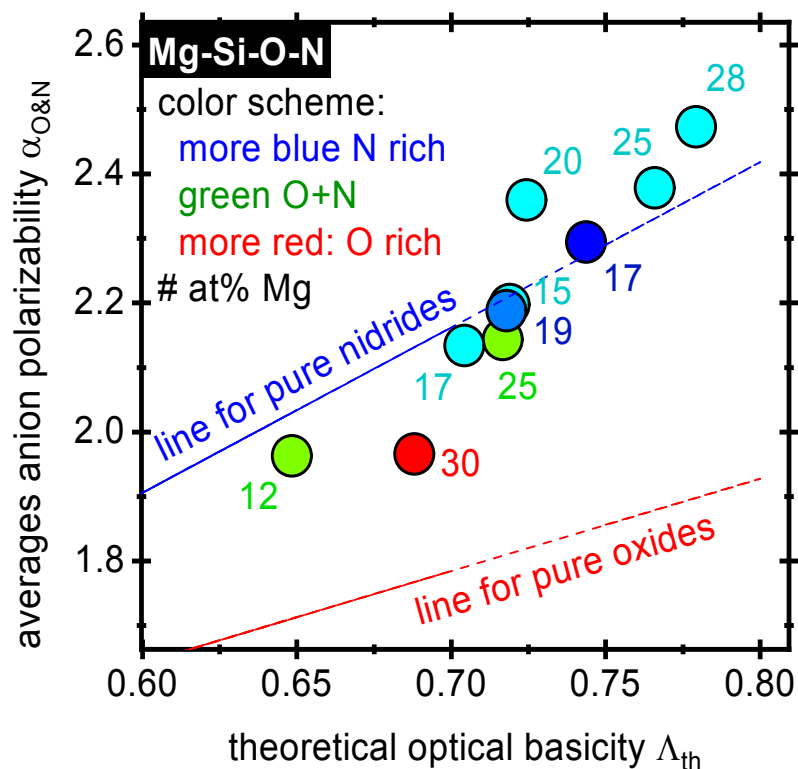

(a)

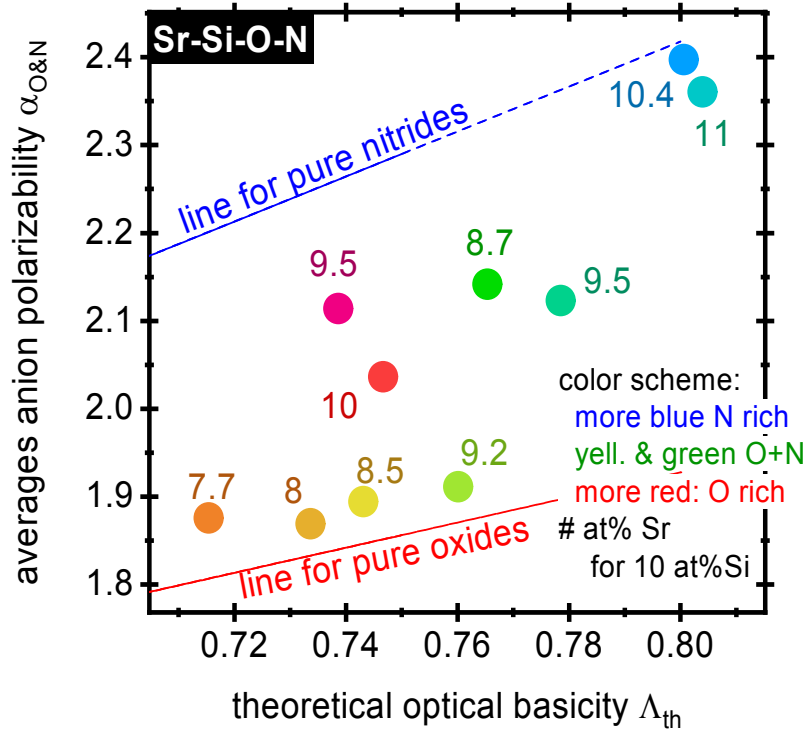

(b)

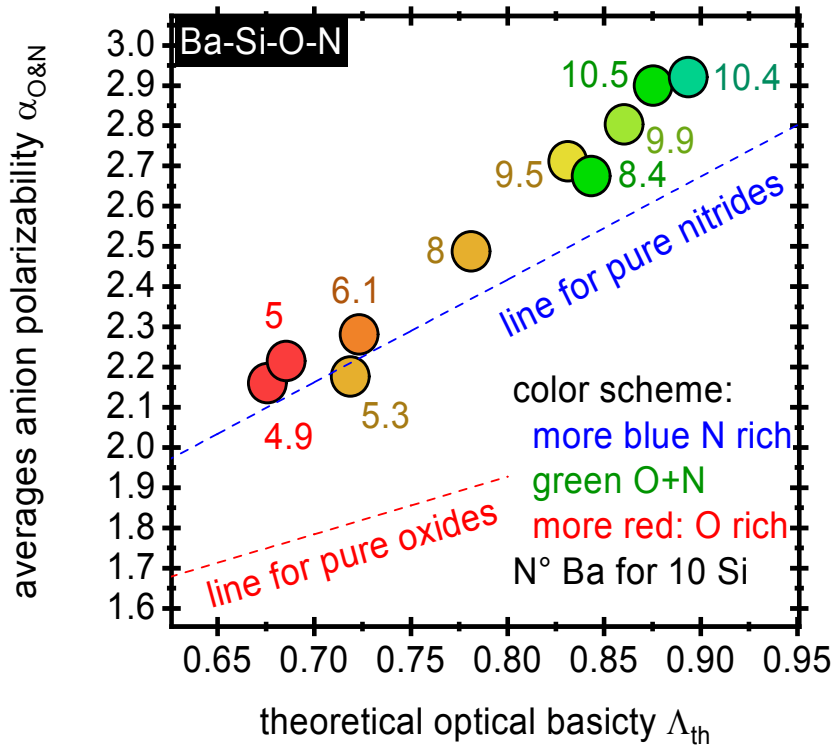

(c)



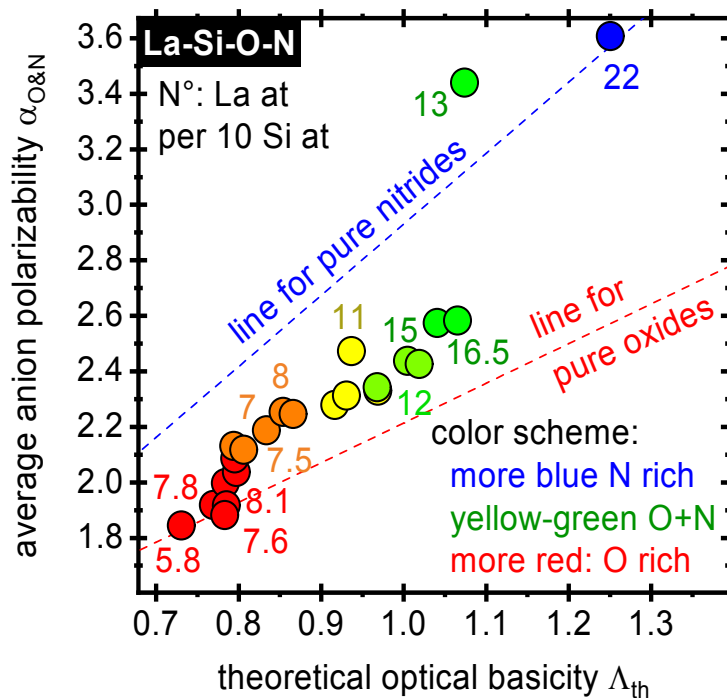

(d)

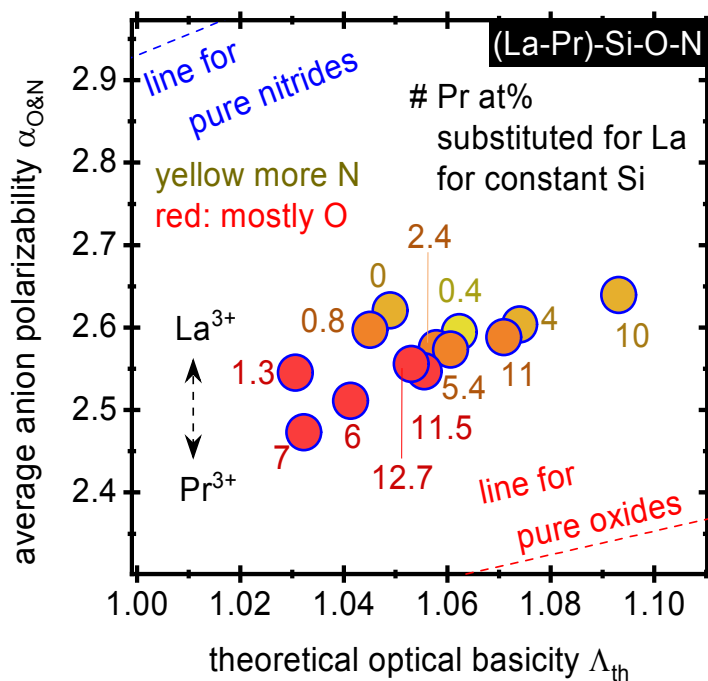

(e)

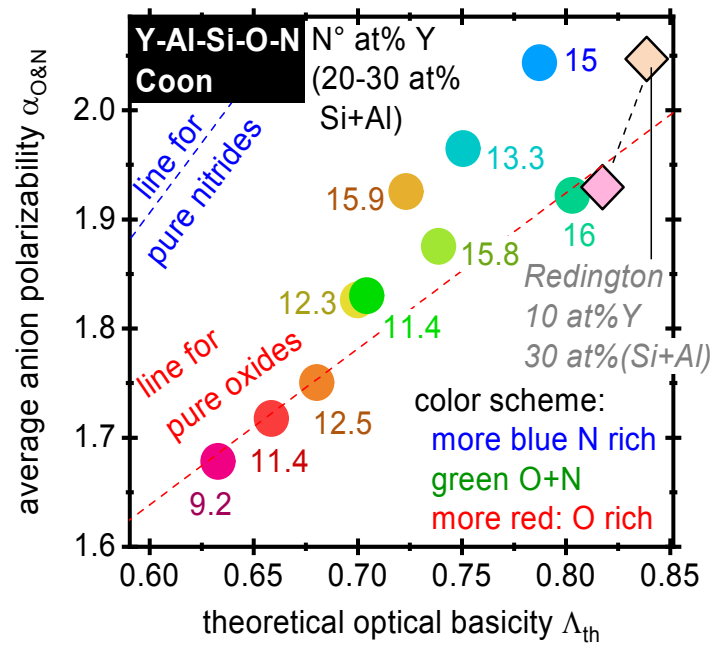

(f)
